# Supplementary material
Source: PubMed Central journal article supplement (PMC6056878)
Supplement: IAI.00319-18_zii008182498s4.pdf [file IAI.00319-18_zii008182498s4.pdf]

**TABLE S2. Oligonucleotides used in this study**

| Primer                  | Forward sequence                                                                   | Reverse sequence                                                                      | Reference or source |
|-------------------------|------------------------------------------------------------------------------------|---------------------------------------------------------------------------------------|---------------------|
| wzy                     | AAACCTCGCTTCCATTAGT                                                                | AATGCTGTTCTTGTGCTTC                                                                   | This study          |
| wzzfepE                 | ATGAATGTGAGTGACGTGAA                                                               | ACGGCGACAGTTGATATTTA                                                                  | This study          |
| wzzST                   | ATCGGAAGTGCTGGATAATC                                                               | TTTACCGACTGTTCAATGGT                                                                  | This study          |
| fliC                    | ACGGTAACTTTGGCGTAATA                                                               | CTGACCAGAAAATTGATGGC                                                                  | This study          |
| sipA                    | TTTAGTAGCCGCCTGCGATAA                                                              | GCCGTGGTACCGTCTACCA                                                                   | (1)                 |
| sopB                    | CGGGTACCGCGTCAATTTC                                                                | TGGCGGCGAACCCTATAAA                                                                   | (1)                 |
| invF                    | CAGGACTCAGCAAAACCCATTT                                                             | TTATCGATGGCGCAGGATTAG                                                                 | (1)                 |
| fliA                    | TTGGTGCGTAATCGTTTGATG                                                              | CTGGAAGTCGGCGAATCG                                                                    | (1)                 |
| flhDC                   | GTCAAACCGGAAATGACAAACTA<br>A                                                       | ACCCTGCCGCAGATGGT                                                                     | (1)                 |
| motA                    | TTACCGCCGCGACGATA                                                                  | CCAACAGTCTGGCGATGGT                                                                   | (1)                 |
| bass                    | CGGTAAAAAGGCGTTCATTGTC                                                             | CGTCTCGGCGATCAATCAA                                                                   | (1)                 |
| rpoA                    | GCGCTCATCTTCTTCCGAAT                                                               | CGCGGTCGTGGTTATGTG                                                                    | (1)                 |
| wzzfepE-<br>pBADMycHisA | CTCGAGCCATCTCTTAATGTA<br>ACAA                                                      | AAGCTTGACTAACCGTTCATCT<br>AT                                                          | This study          |
| wzzST-<br>pBADMycHisA   | CTCGAGTGTACCTATCATTATGC<br>AGA                                                     | GAATTCGTTCCGAAAACCGAAT<br>AT                                                          | This study          |
| wzzfepE-Lambda<br>Red   | ATGCCATCTCTTAATGTA<br>AGAAAAAATCAGTCATTTGCAG<br>GTTAGTGTAGGCTGGAGCTGCTT<br>C       | TCAGACTAACCGTTCATCTATC<br>GCCAGCGCGTTTTCCATTTTAC<br>GCGAGACCATCATATGAATATC<br>CTCCTTA | This study          |
| wzzST-Lambda<br>Red     | ATGACAGTGGATAGTAATACGTC<br>TTCCGGGCGTGGGAACGATCCGG<br>AACAGTGTAGGCTGGAGCTGCTT<br>C | TTACAAGGCTTTTGGCTTATAG<br>CTACGTAGCGCATTGCGTCCCA<br>GCACAATCCATATGAATATCCT<br>CCTTA   | This study          |

1. Moreira CG, Weinshenker D, Sperandio V. QseC mediates Salmonella enterica serovar typhimurium virulence in vitro and in vivo. Infect Immun. 2010;78(3):914-26.
